# Supplementary material for: Low expression of NCALD is associated with chemotherapy resistance and poor prognosis in epithelial ovarian cancer
Source: J Ovarian Res. 2020 Mar 30;13:35. doi: 10.1186/s13048-020-00635-6 (PMC7106630; doi:10.1186/s13048-020-00635-6)
Supplement: Supplementary file 1 — Additional file 1: Supplementary document 1. The complete list of differentially expressed genes. Supplementary document 2. The complete list of differential gene set. Supplementary document 3 Stratified analysis. [file 13048_2020_635_MOESM1_ESM.xlsx]

## Sheet: Supplementary document 1
Supplementary document 1.The complete list of differentially expressed genes
NAME	SCORE
NCALD	1.27195
PLEKHF2	0.414692
KRT23	0.404248
RNF19A	0.397125
EMC2	0.396309
stk3	0.381203
EBAG9	0.374916
NPAS2	0.374481
ITGA9	0.372962
MTDH	0.36737
SLC25A32	0.366698
AZIN1	0.3631
CPQ	0.359677
RRM2B	0.357833
ATP6V1C1	0.356605
ZNF706	0.355943
SGCD	0.34581
FZD6	0.345753
YWHAZ	0.343304
LAPTM4B	0.343132
EGLN3	0.341945
UBR5	0.338001
PTGER2	0.33749
DERL1	0.337024
POLR2K	0.335106
SPAG1	0.334773
TMPRSS4	0.334611
NRP2	0.331222
FAM91A1	0.328688
PRKCH	0.326222
gpr141	0.323788
OXR1	0.323617
RNF152	0.322929
COX6C	0.322395
GRAMD3	0.321761
ACKR2	0.319015
TRPS1	0.318136
KIAA1429	0.31734
FGD5	0.316013
tmem65	0.314786
OSMR	0.312822
DCAF13	0.309722
TMBIM1	0.30957
SUSD4	0.309509
TMEM71	0.307613
TLR5	0.306739
PLPP2	0.306479
SPRY4	0.304919
QPCT	0.30404
CD55	0.302564
IL1RAP	0.301372
RIDA	0.298442
PGM2L1	0.29755
NUDCD1	0.297297
DAPP1	0.297213
VTCN1	0.296474
BST1	0.296016
TNC	0.295943
RNF149	0.294138
ETS1	0.293639
VPS13B	0.292015
TMEM154	0.290674
SMARCA2	0.287988
amy2a	0.287473
NECTIN4	0.286337
ELMO1	0.285738
MATN2	0.284581
LAMC2	0.283765
MGLL	0.282503
GSDMC	0.282149
SMIM14	0.282092
ENY2	0.280251
TPST2	0.27941
Amy1a	0.279255
PSTPIP2	0.279115
XBP1	0.27813
PTK2	0.277796
entpd3	0.277389
ENC1	0.275936
SFT2D2	0.274665
DUSP10	0.273027
P2RY6	0.272615
STK17B	0.272247
GPAA1	0.272239
MAML2	0.272131
USP53	0.27138
FAM49A	0.271288
RIPK2	0.270853
RGL1	0.27062
CX3CL1	0.269631
DUSP6	0.269081
ATP8B1	0.268603
SLC24A3	0.268405
KCND2	0.268282
RAD21	0.268043
S100A16	0.267423
SLC26A2	0.267241
EXT1	0.267209
TMEM173	0.266991
ADAM9	0.266738
SGMS1	0.266362
VPS28	0.265466
Uqcrb	0.265275
POLD4	0.265101
UBE2W	0.264534
RNF150	0.264437
DIRAS2	0.26439
SUSD6	0.264114
EMP1	0.263516
KHDRBS3	0.263265
CAPS	0.26293
NEK6	0.262358
nme8	0.262212
MMD	0.26169
EFR3A	0.261382
RNF139	0.261311
UTP23	0.259949
PKHD1L1	0.259748
ITGAV	0.259629
FAS	0.259419
GBP5	0.259284
FAM20A	0.259208
KLF10	0.2578
INTS8	0.257339
NOD2	0.256374
PDGFRL	0.255992
CFH	0.255851
CFHR2	0.254622
FRMD4B	0.254482
c8orf4	0.254216
TICAM2	0.253678
IL4I1	0.25337
WWP1	0.252121
lemd1	0.251002
GPNMB	0.250767
STARD13	0.250057
DOCK9	0.249747
PDGFRA	0.249335
TRIB2	0.248714
DPY19L4	0.248478
SHROOM3	0.248303
ADAMTSL3	0.248115
CR1	0.248089
LYN	0.248023
TRAM1	0.247755
TPD52	0.247412
ANXA1	0.247218
ZNF7	0.246931
CPNE3	0.246733
PCDH7	0.246052
CD58	0.24599
TMEM87B	0.245863
RASGRF2	0.245164
SGMS2	0.244944
CCL4	0.244485
RAB2A	0.243798
BHLHE40	0.242721
SLC27A6	0.242657
PCTP	0.242433
TAF2	0.24229
KAT2B	0.241783
AMPH	0.241159
S100A6	0.241085
ITGB6	0.240574
NCF2	0.240379
CDH6	0.240257
TNFRSF11B	0.240029
CBLB	0.239937
SPP1	0.239914
NBN	0.239828
SNTB1	0.239825
WNT7A	0.239405
ARL6IP5	0.239149
NDRG1	0.239107
MMP10	0.239046
lacc1	0.23879
OSTF1	0.238287
ETV4	0.237987
CHST1	0.237797
FAM107B	0.237777
S100A11	0.236967
VPS4B	0.236737
ACSL1	0.236694
CPED1	0.236594
SPON1	0.236154
FTH1	0.235335
TBC1D8	0.235315
SEMA4A	0.234793
CADM1	0.234715
LIMS1	0.234399
CXCL1	0.234354
MS4A8	0.233959
plekhb2	0.23381
TLR1	0.233616
OTUD6B	0.233597
CTBS	0.233368
WDR45B	0.233361
GOLPH3	0.233173
SORL1	0.232874
FCGR3A	0.231937
NDUFAF6	0.231634
SLC6A6	0.231409
NFKB1	0.231139
SERPINB8	0.230786
SPATA18	0.230663
ASAH1	0.230463
TTC9	0.230215
GLIPR1	0.230149
OSGIN2	0.229916
FAM198B	0.229502
UPK1B	0.229266
CYB5R2	0.229219
FMO2	0.229187
LMNA	0.229171
PLEKHS1	0.228627
IDO1	0.228608
PRSS23	0.228467
CEACAM1	0.228462
BCL2A1	0.228291
KCTD1	0.22816
CPNE2	0.228005
YTHDF3	0.227777
CD59	0.227103
IRX3	0.226892
SNX31	0.22661
DNAJA4	0.226045
CDH11	0.226035
LYZ	0.225822
F13A1	0.225772
VLDLR	0.22571
serpina1	0.225501
DAAM2	0.225486
CNDP2	0.2254
SHARPIN	0.225088
EIF3H	0.22508
SLC39A4	0.224629
PABPC1	0.22428
PSMD5	0.224128
slc39a8	0.223981
ANTXR2	0.223962
THEM6	0.223927
CD81	0.223712
DGAT1	0.223612
GRHL2	0.223611
FRMD6	0.223563
SPSB1	0.22354
TLR4	0.223375
LEPROT	0.223354
IKZF2	0.22331
hla-dra	0.22329
F3	0.223104
LYST	0.222981
PDP1	0.222955
RAB14	0.222452
SEMA3C	0.222154
PROM2	0.222064
NMNAT2	0.222007
PHF20L1	0.221609
S100A9	0.221517
ppp1cb	0.221437
AQP5	0.221054
SYNGR2	0.221036
ITGB2	0.220994
RALB	0.22099
ZFAND1	0.220669
HNMT	0.220494
ZNF34	0.220333
LRRC6	0.220239
FAT2	0.220193
XPR1	0.220134
DPYD	0.220021
SLC34A2	0.219841
LDB2	0.219524
FIBIN	0.219484
HLA-DMB	0.218438
MTERF3	0.21796
UBL3	0.217893
SUSD2	0.217763
GBP4	0.217471
SLC14A1	0.217454
MED30	0.216831
TMEM59	0.216691
NOV	0.216605
RMDN1	0.216605
CYB5R1	0.216214
il6st	0.216144
VMP1	0.215986
CASP7	0.215948
tuba4a	0.21578
HAPLN3	0.215588
ARAP2	0.214945
CD69	0.214916
CCR1	0.214868
NT5E	0.214863
FAM114A1	0.214731
SARAF	0.214428
B3GALT4	0.214193
STK17A	0.214076
FCGR3B	0.213796
NRIP1	0.213694
ANKRD35	0.213516
KDM7A	0.213421
PAPSS2	0.213255
PDZD2	0.213181
SLC46A2	0.213009
CH25H	0.212499
TRMT12	0.212158
CTSB	0.212071
EVA1A	0.211957
SDCBP	0.211826
NIPAL2	0.211646
CTSS	0.211637
ITGB3	0.211146
TFAP2C	0.211089
NMRK1	0.21081
GJB6	0.210623
IMPA1	0.210377
NPTX2	0.210143
RNF14	0.210088
MTUS1	0.209834
GPX3	0.209736
CA13	0.209455
LRRFIP1	0.209451
CTSO	0.20929
SQLE	0.209238
CFHR3	0.209199
CSGALNACT2	0.208701
TANK	0.208697
PTDSS1	0.208351
C3AR1	0.20812
ACBD3	0.208096
PLIN3	0.208065
CCL2	0.208039
HSPA5	0.207939
CHST15	0.20792
KLK6	0.20791
ZNF623	0.207859
TNFAIP3	0.207829
GLIS3	0.207472
TMEM62	0.207464
AGO2	0.20745
RUNX1	0.207412
GJA5	0.207165
MAP3K5	0.2071
MRPL13	0.2069
KLHL6	0.206817
TAPT1	0.206773
TP53INP1	0.20663
CDK2AP2	0.206448
MPZL2	0.206312
OXGR1	0.206101
CLEC4E	0.20605
CNN2	0.205825
SGPL1	0.205662
PYCRL	0.205661
JAML	0.205453
GJB2	0.205384
TRIM2	0.205378
STAT3	0.205368
DHRS7B	0.205307
PTPRC	0.205219
SQRDL	0.205188
FMO1	0.20507
B2M	0.205065
CD74	0.205055
BEND6	0.20501
LMAN1	0.204955
Efcab13	0.204661
DPP4	0.204657
ANKRD22	0.204611
A4GALT	0.204606
Cyc1	0.20458
c8orf76	0.204554
UGDH	0.204408
CYB561	0.204369
ABI1	0.204366
RAB18	0.204344
IRX5	0.204124
RBKS	0.203873
TTC39B	0.203793
CFI	0.203778
GBP2	0.203762
C10orf10	0.203709
ABCA6	0.203645
HOOK3	0.203603
ARHGDIB	0.203435
LRIG1	0.203035
HLA-DMA	0.202524
COL6A3	0.202505
DRAM1	0.20249
CCL18	0.202431
ELL2	0.202187
c8orf33	0.202157
SLC31A2	0.201982
FBXL5	0.201929
CYBA	0.201745
GRINA	0.201556
PABPC3	0.201521
TMEM87A	0.201474
ATP6V1B2	0.201245
PDCD1LG2	0.200992
FCER1G	0.200709
GZMB	0.200504
S100A4	0.200062
LRRC3B	0.199751
RHBDL2	0.1996
SLC28A3	0.199272
SERPINE2	0.198721
P2RY2	0.198458
TLR6	0.19844
FAM151B	0.198351
FAM3C	0.198217
TMEM200A	0.198165
ANXA2P2	0.198156
LAPTM5	0.198101
ctsl	0.197798
SPRY2	0.197773
DNAJB14	0.197549
CLEC2B	0.197042
ST6GALNAC1	0.196961
DEPTOR	0.196907
ANKRD46	0.196899
FNDC1	0.196878
ZCCHC6	0.196656
PREX2	0.196526
LHFPL2	0.196457
SULF2	0.196344
CHL1	0.196126
S100A2	0.195976
PHLDA3	0.19595
LEPROTL1	0.195926
EPHX4	0.195798
PGRMC2	0.19576
GSDMD	0.195751
CCL3	0.195693
filip1l	0.195531
ZNF16	0.195383
CLINT1	0.195312
TGFBI	0.195145
RUNX3	0.19498
ARFGEF1	0.194818
IL10	0.194761
CD14	0.194756
arfip1	0.194659
SMOC2	0.194597
BACE1	0.194579
MXRA7	0.194467
CD82	0.19433
TNIP3	0.194169
NDUFB9	0.194085
DCN	0.193831
SH3RF2	0.193591
PTGS2	0.19344
fgfbp1	0.193431
RAB31	0.193424
LDLRAD4	0.193401
VCAM1	0.193389
TSKU	0.193383
ALG2	0.193345
MAL2	0.193188
REn	0.193169
FPR3	0.193101
CMAHP	0.193062
FCGR2A	0.192964
TMEM176B	0.192762
COMT	0.192729
CD53	0.192698
ANXA2	0.192602
TCF21	0.192506
SEC14L1	0.192488
CD163	0.192475
CTGF	0.192422
NEDD9	0.192192
PID1	0.192163
SPCS2	0.192093
HID1	0.192075
CLDN10	0.191975
SLA	0.191948
SRGN	0.191933
GLI3	0.191885
ZEB1	0.191849
NAV3	0.19183
FGL2	0.191823
NCOA4	0.191546
CD46	0.191439
UPP1	0.191364
TNFRSF14	0.191336
KIAA0196	0.191294
CARD6	0.191286
JRKL	0.191219
FAM129B	0.191136
ERRFI1	0.190956
LIMCH1	0.190928
APOL1	0.190844
NAGA	0.190837
HAVCR2	0.190777
TNFAIP2	0.190604
COQ10B	0.190381
ARHGAP25	0.190357
NCOA2	0.190307
SPPL2A	0.190221
PLEK	0.190097
SAMD3	0.189986
LGALS1	0.189836
FBXO32	0.189836
STAU2	0.189722
RAB11FIP1	0.189617
SLC43A3	0.189558
CP	0.189508
AOAH	0.189507
RRAS	0.189395
AIF1	0.189292
LRRK2	0.189278
HK1	0.189248
TLR2	0.189159
TSPAN5	0.189115
GPR84	0.188914
DUSP4	0.188828
PLEC	0.188718
PRR16	0.188699
RHBDF1	0.188477
IGSF6	0.188249
EPHA4	0.188122
ST3GAL1	0.188119
Scgb2a2	0.188047
pmvk	0.188046
arhgap18	0.187979
TNFRSF10A	0.187977
PROM1	0.187762
SLC35B3	0.187667
SLC52A2	0.187615
CTSD	0.187559
KIAA0513	0.187452
RHBDD1	0.187356
TNFSF13B	0.187337
CCR5	0.187317
PAG1	0.187264
GMPPB	0.187257
TREM1	0.187217
SPRY1	0.187203
MEOX1	0.187203
HS3ST1	0.187104
RAI14	0.18689
KDELR3	0.186781
SFRP4	0.186665
SURF4	0.186658
CXXC5	0.186612
KIR2DL3	0.186603
ADAM17	0.186552
FRYL	0.186529
olfml1	0.186439
MGAT1	0.186414
HLA-DPA1	0.186409
MNDA	0.186382
SDC2	0.18637
CXCL10	0.186338
TNFSF10	0.186318
EIF3E	0.186303
ISLR	0.186236
GABBR2	0.186179
LMO2	0.1861
CASP6	0.186058
KYNU	0.186012
SLC25A30	0.185997
OR1F1	0.185991
S100A13	0.1858
DAB2	0.185794
SCGB2A1	0.185704
FZD1	0.185668
TMED10	0.185628
SYNGR1	0.185626
A2M	0.185616
HRH1	0.185481
FAM49B	0.185416
EXOSC4	0.185402
CPD	0.185309
C1QC	0.185266
APOL6	0.18511
ZHX1	0.185102
MS4A7	0.18495
Fcgr2b	0.184903
LTBP2	0.184804
sned1	0.184802
HLA-C	0.184738
CFHR1	0.184632
KCNJ2	0.184478
SEC24D	0.18428
SLMAP	0.184266
RGCC	0.184259
C11orf80	0.184191
ZEB2	0.184075
ARHGAP30	0.184027
LAMA3	0.183999
CLEC4A	0.183976
ADAMDEC1	0.183922
BCL3	0.18391
SLC2A9	0.183905
CTHRC1	0.183816
PEA15	0.183635
CST7	0.183524
PTPN22	0.183496
GADD45B	0.18326
MAFB	0.183147
ACOX1	0.183114
LEPR	0.182928
TSPAN12	0.182877
tmem70	0.182852
ABCA9	0.182707
WISP1	0.182675
LY96	0.182671
ARFGAP3	0.182627
IL7	0.182564
LHFP	0.18249
SLC46A3	0.18248
TRIM22	0.182401
LRG1	0.18237
SCUBE2	0.182351
NOX4	0.182344
TMEM109	0.182233
PPARG	0.182215
ST8SIA4	0.182194
tmem150c	0.181988
MSMO1	0.181772
HCK	0.181746
PUF60	0.18172
PMEPA1	0.181634
SPTLC3	0.181464
AGPAT2	0.181446
TMEM100	0.181054
SCD	0.181017
RAB25	0.180921
HSF1	0.180806
PDE9A	0.18053
CTSK	0.18053
ZNF750	0.180462
IL15	0.180413
CCL5	0.180318
MAST4	0.180303
TSPAN14	0.18017
IL2RB	0.180156
PLA2G5	0.180113
BCL10	0.17996
SEC24B	0.179884
MS4A4A	0.179775
CHMP4C	0.179702
TATDN1	0.179561
C11orf63	0.179496
ST6GALNAC5	0.179438
KDSR	0.179352
CD44	0.179287
GIMAP1	0.179212
EVI2B	0.179138
ALOX5AP	0.179061
COLEC12	0.179037
CMKLR1	0.179029
SMAD7	0.178813
CPA3	0.178559
THSD4	0.178553
ARHGAP32	0.178451
MYLK	0.17845
RNF170	0.178449
CACNA2D3	0.178374
IRF1	0.178281
GALNT14	0.178205
EHF	0.178196
MAF1	0.178138
TCEB1	0.178123
RIOK3	0.178092
SIPA1L2	0.178074
OLR1	0.178027
MSR1	0.17801
MARCO	0.17786
PIM3	0.177751
MIR4435-2HG	0.177739
TMEM55A	0.177706
HOXD8	0.177699
GALNT10	0.177686
CNRIP1	0.17764
MS4A6A	0.177568
TWF2	0.177551
FKBP2	0.177402
CPXM2	0.177347
COL6A2	0.177226
IL1B	0.177217
RARRES3	0.177102
FBP1	0.177055
hcar3	0.176904
PHLDA2	0.176806
MGAT4A	0.176762
PLK3	0.176707
aldh3b2	0.176579
SAMSN1	0.176442
VDR	0.176421
SLAIN2	0.176342
NINJ1	0.17626
SORCS2	0.176146
CNTN1	0.17589
IRF8	0.175873
CEPT1	0.175853
PDGFC	0.175843
GIMAP4	0.17581
TSHZ3	0.175803
ECM2	0.175743
FLI1	0.175715
NAALADL2	0.175702
ACOX3	0.17568
IL7R	0.175659
TCTEX1D1	0.175624
PDE10A	0.175533
MALT1	0.175528
MPEG1	0.175492
TM9SF3	0.175467
C1orf162	0.175386
ESRP1	0.175347
RNF144B	0.175336
ACSL3	0.175269
ZAK	0.175225
GIMAP7	0.175222
PLXND1	0.175113
HDHD3	0.175112
DRAM2	0.174987
C18orf25	0.174971
ADGRG1	0.174841
SLAMF8	0.174832
ARCN1	0.174556
RBPJ	0.174346
AHNAK	0.174335
apol3	0.17428
CLEC7A	0.17428
ATP8B4	0.174178
GIMAP6	0.174042
CLEC4D	0.173963
PMP22	0.173873
TNFAIP8	0.173869
WDYHV1	0.173824
C1QTNF1	0.173795
TMEM67	0.173719
LIN54	0.173703
CCDC82	0.173695
BCAT1	0.173693
C6orf15	0.173389
MUM1	0.173364
HLA-DRB1	0.173296
pik3ap1	0.173292
CYTH1	0.173219
POP1	0.173191
INPP4B	0.173189
ARHGAP26	0.173124
UBXN4	0.173098
RFK	0.17307
IL33	0.173057
ETV5	0.172893
AMY2B	0.172699
ABCA8	0.172697
TADA2B	0.172627
HLA-DQB1	0.172564
CD84	0.172553
HLA-B	0.172511
FBN1	0.172429
TRIM29	0.172302
ADSS	0.172288
LMBRD1	0.172175
ATG7	0.172173
PPFIBP2	0.172151
CHI3L1	0.172081
SOD3	0.17199
LURAP1L	0.171959
MMP12	0.17195
CCL7	0.171856
MVP	0.17185
SLC38A6	0.171378
EPAS1	0.171233
HLA-E	0.171213
GRPEL1	0.171212
FHOD3	0.170979
MMP13	0.17091
ARL8B	0.170834
GLT8D2	0.170712
HLA-DPB1	0.170628
FEM1C	0.170535
PCMTD1	0.170509
CXCL17	0.170475
GIMAP2	0.170453
NUCB1	0.170447
C1QA	0.170444
MFGE8	0.170309
LRP12	0.170306
CASP1	0.170022
lpar6	0.169943
CYP1B1	0.169933
GIMAP5	0.169899
RAB27A	0.169774
TM6SF1	0.169746
CD300LF	0.16962
CDC42EP3	0.169608
GABRP	0.169592
S100A3	0.169569
FAM102B	0.169525
HTRA4	0.169502
GLRX	0.169339
SEC31A	0.169289
GRSF1	0.169089
VWA1	0.169063
EMP3	0.168988
IL20RA	0.168979
EDAR	0.168961
ITGAM	0.16895
PLEKHO2	0.168789
MEF2C	0.168741
ITPKB	0.168447
tap2	0.168436
STEAP2	0.168419
AIMP1	0.16839
IL18RAP	0.168378
CLEC5A	0.168333
FAM46C	0.168261
AK7	0.168244
EHD4	0.168144
SLC31A1	0.168013
DNAH5	0.168001
SNX16	0.167976
LIMK2	0.167945
SOD2	0.167903
RAB1B	0.167882
PLAUR	0.167833
TGFBR2	0.167789
ABCA1	0.167779
EPHX1	0.167681
SYNPO2	0.167513
NCF1	0.167464
MAP3K19	0.167391
TMEM267	0.167333
HLA-F	0.167317
NALCN	0.167182
CYTIP	0.16712
RCN3	0.167107
PAEP	0.167087
RHOJ	0.167076
SLC35A3	0.167076
CHST2	0.167062
IL4R	0.167049
c8orf37	0.167039
RNASE6	0.167034
AIM2	0.166811
TMEM30A	0.166803
COL1A2	0.166772
C1S	0.166751
AQP1	0.166534
MRRF	0.166388
SUCLG2	0.166235
SLC44A1	0.166033
HLA-DQA2	0.165877
CD180	0.165774
LCP2	0.165713
SLC22A4	0.165447
FUT2	0.165402
MYO1E	0.165287
SELENOW	0.16505
FMO3	0.165041
ELK3	0.165036
ENDOD1	0.164894
EVI2A	0.164729
ARHGAP31	0.164533
EMILIN1	0.164492
SREBF1	0.164433
MAN1A2	0.164425
SYNE2	0.164388
PHKB	0.164357
SLCO1B3	0.164231
GRIN3A	0.164156
VAV3	0.16414
RNASE2	0.164109
dock10	0.164072
COL6A1	0.164044
GORASP2	0.164035
VSTM4	0.164013
ACTR3	0.163976
UEVLD	0.163615
SPRED1	0.163574
DEFB1	0.163518
ANKRD13C	0.163367
NLRC4	0.163332
FPR1	0.163319
HTR2B	0.163277
LAP3	0.163184
OMD	0.163168
FAM107A	0.163133
ANPEP	0.163049
FCGR1A	0.162827
FCN1	0.162826
CDC42SE1	0.162813
LILRB2	0.162794
FAM120A	0.162722
SPARCL1	0.162686
MANF	0.162603
HMCN1	0.162552
SERPINA3	0.162508
DUSP27	0.162415
GBP3	0.162399
MPPED2	0.162336
ZFYVE19	0.16231
MUC16	0.162295
FYB	0.162268
ZDHHC5	0.162266
GPR107	0.161995
FOLR2	0.16194
plrg1	0.16194
MILR1	0.161937
EYA2	0.161894
HES1	0.16189
SELP	0.161802
CR1L	0.16174
UBC	0.161671
FLVCR2	0.161617
CASC4	0.161593
GCLM	0.161582
C7	0.161571
ZBTB10	0.161562
ZNF217	0.161524
GNG2	0.161504
BICC1	0.16132
DACT1	0.161259
SLCO2B1	0.161249
iqgap1	0.161199
ROBO2	0.161103
RFTN2	0.160917
siglec10	0.160888
PRR5L	0.160854
ARHGAP39	0.160854
ERCC6L2	0.160798
prok2	0.160777
CPPED1	0.160733
PDLIM5	0.160697
RNF130	0.160538
USP28	0.160417
KRT6A	0.160391
LDLR	0.160218
TAP1	0.16002
MGAT5	0.159982
RIMS2	0.15989
BHLHE22	0.159813
CFB	0.159765
TBC1D14	0.159735
IL32	0.159666
MAN2A1	0.15944
RBM47	0.159346
ITIH5	0.159338
FKBP15	0.159213
HCAR1	0.159212
MMP2	0.159196
TCIRG1	0.159193
NEK7	0.159188
LRRC8A	0.159186
ptafr	0.15907
FPR2	0.159045
GPBP1	0.158976
LITAF	0.158973
PLCXD3	0.158967
HERPUD1	0.158871
PDLIM3	0.158826
ADM	0.158788
TMEM9B	0.158756
GZMA	0.158715
PHLDA1	0.158691
BOP1	0.158671
SPTLC1	0.158643
ALAD	0.158603
TAGAP	0.158405
TNF	0.158386
HSD11B1	0.158239
CLDN16	0.15823
MTBP	0.158112
TERF1	0.158046
GPR12	0.157954
USP8	0.157869
DPYSL3	0.157852
CHRAC1	0.157827
COL12A1	0.157801
PRICKLE1	0.157793
CYP51A1	0.15768
LACTB	0.157631
STT3A	0.157587
IFFO1	0.157494
ECE1	0.157433
TMEM158	0.157418
OPLAH	0.157314
GGTA1P	0.15726
TMEM50A	0.157256
LCN2	0.157179
CCL8	0.157106
SAMD12	0.157106
EHD2	0.156952
CSNK1A1	0.156927
PSMB10	0.156916
NKG7	0.156882
STOM	0.156769
ADCY7	0.156765
TMEM167B	0.156743
SLC15A3	0.156738
CXCL11	0.15666
gpr1	0.156657
TBC1D31	0.156539
TGFA	0.156515
SLC16A3	0.156435
SLC9A3R1	0.156373
UBE2L6	0.156308
DNAJC3	0.156018
gbp1	0.155995
Cox7a1	0.155983
AMIGO2	0.15583
ETV1	0.15577
TRAPPC9	0.155674
P2RX4	0.155645
PPP1R9B	0.155611
CFLAR	0.155578
RASSF2	0.155576
ANKH	0.155536
TAPBP	0.155464
CCL11	0.155456
PRDM1	0.155443
TSHZ2	0.155406
LILRB4	0.155346
CRTAM	0.155321
SPIN1	0.155193
MCTP1	0.155159
ATAD2	0.155157
TNFRSF21	0.155145
PDE4B	0.155123
GAS7	0.155123
PLA2G12A	0.155091
LRRC25	0.155057
ZFR	0.155031
MRVI1	0.154997
HGD	0.15497
IL2RA	0.154936
TMEM79	0.154898
CADPS	0.15489
OSBPL3	0.154853
ITPR1	0.154798
ERP44	0.154752
LTB	0.154734
CD2	0.154721
RFTN1	0.154717
EDEM1	0.154699
herc3	0.154698
ASAP2	0.154693
WDFY4	0.154623
HTR3A	0.154597
MFSD14A	0.154566
TJP2	0.154527
KCNN4	0.154501
TMEM133	0.154315
CRAT	0.154305
RAB3D	0.154265
PTPRE	0.15421
NUPR1	0.154189
NNMT	0.154148
METAP1	0.154036
CSF1R	0.153957
GADD45A	0.153948
PTTG1IP	0.153866
alpk1	0.153862
ASRGL1	0.153722
MMP7	0.153701
VIM	0.153687
RAB5A	0.153651
CTSZ	0.15363
STIP1	0.153496
MGAT5B	0.15347
LAIR1	0.153425
NPC1	0.153379
AIM1	0.153324
PRR15	0.153285
TRPV2	0.153274
OSBP	0.153259
ZNF267	0.153153
CFD	0.153142
CNOT6L	0.153107
CASP4	0.153071
MTFR1	0.15305
RGS18	0.152961
STIM1	0.152949
AP1AR	0.152939
TMTC2	0.152936
SEC16A	0.15281
HCLS1	0.152723
DNAJB2	0.15271
LY6E	0.152626
SLFN5	0.152593
ADAM10	0.152543
GSTM5	0.152527
C1QTNF3	0.152371
AHNAK2	0.152368
SERPINB7	0.152274
ABHD2	0.152209
SLC7A2	0.152206
SEC14L2	0.152158
TMEM176A	0.15215
FGR	0.15214
ST8SIA6	0.152094
PTPA	0.151859
WDFY3	0.15175
LPXN	0.151675
PRICKLE2	0.151647
NLRP3	0.151601
TMPRSS13	0.151475
TOB1	0.151463
SPTBN2	0.151454
KDELR1	0.151402
CLMP	0.151366
ZNF469	0.151354
CCL23	0.151314
SSFA2	0.151228
CDR2	0.151212
DUSP5	0.151029
FNBP1	0.150916
TOR1B	0.150861
ANKRD44	0.150848
GOLGA2	0.150836
SAYSD1	0.150796
CD6	0.150773
TRIP4	0.150763
YIPF5	0.150738
TMOD1	0.150731
DST	0.15063
NDFIP1	0.150629
SYNE1	0.150495
BBOF1	0.150365
STEAP3	0.150142
IFI16	0.150126
CITED4	0.150096
SH3D19	0.150044
IL10RA	0.150042
CHST4	0.149959
BDNF	0.149956
2019-09-11	0.149955
ACVR1	0.149875
NLRX1	0.149726
RNASE1	0.149721
SLC12A2	0.149612
SNX19	0.14958
VPS13C	0.14954
PICALM	0.149502
LYNX1	0.149487
FEZ2	0.149481
FAM171B	0.149459
TRIM38	0.149409
ASAP1	0.149373
ABCG1	0.149196
Mir22hg	0.149163
PPP3CA	0.149116
KIAA1549L	0.149044
CREB3L1	0.149029
TBC1D22A	0.148902
PARP9	0.148841
TBXAS1	0.148835
KIAA1468	0.148807
c14orf28	0.148781
SPR	0.148716
RGS4	0.148697
IER3	0.148601
ANTXR1	0.148581
RABGAP1L	0.148536
PANX1	0.14844
TRABD2A	0.148338
SNAI2	0.148302
rin2	0.148291
SSR1	0.148215
ACP5	0.14805
TMEM140	0.147982
TSTA3	0.147918
IDH3A	0.147907
VCPIP1	0.147841
PDXDC1	0.147829
SAA2	0.14774
ADCY4	0.147729
2019-03-03	0.147598
ATP10A	0.147597
SH2B3	0.147581
SH3TC1	0.147535
SLC39A11	0.147441
RAPH1	0.147292
CCL13	0.147269
RTN2	0.147256
ITGA8	0.147164
PDZRN3	0.147134
DNAJC5B	0.147038
MREG	0.147028
TVP23B	0.147015
KLF3	0.146981
PPP1R2P3	0.146967
SHISA2	0.146925
BLOC1S4	0.146785
TMEM138	0.146734
Tigit	0.146661
SLC9A9	0.146632
C15ORF48	0.14661
Hist2h2aa3	0.146518
MGP	0.146507
SH3GLB1	0.146497
CD2AP	0.146477
RPL30	0.14645
CD1A	0.146441
GPR65	0.146408
APOL2	0.14636
VWA5A	0.14632
JAK1	0.146192
KCTD8	0.146172
SLK	0.146094
MMP3	0.146056
APCDD1	0.146045
GPRC5C	0.146031
MAFF	0.14602
PQLC3	0.145988
CAPN5	0.145963
CLEC10A	0.145938
CEBPD	0.145891
ARHGAP9	0.145866
TMX2	0.145811
HIST1H3E	0.145759
LST1	0.14574
C1QB	0.145719
ABCD2	0.145594
ITGA11	0.145555
WDFY1	0.145538
HLA-DRB5	0.145452
GNA14	0.14542
FAM19A5	0.145363
MROH1	0.145312
BAALC	0.145286
GLUL	0.145194
GNAQ	0.145148
SNX18	0.145139
ADGRA2	0.145023
CAPG	0.14501
LIPG	0.144978
REEP5	0.144905
EIF4E3	0.144882
ARMC1	0.144872
spdef	0.14481
CCPG1	0.144802
WFS1	0.14471
WDR20	0.144693
SMIM3	0.144675
RNASEL	0.144524
AEBP1	0.144353
GZMK	0.14433
DBNL	0.144295
COMMD5	0.144258
IGDCC4	0.144207
CAMK2N1	0.144185
FERMT3	0.144175
Card17	0.144138
THBS1	0.144095
PSMB9	0.144094
CPEB2	0.144041
GEM	0.143984
SPRR2F	0.143979
SERPINB1	0.143954
TMC6	0.143952
BSPRY	0.143948
COPZ2	0.143852
SLED1	0.143759
ADAM28	0.143753
RBMS3	0.143701
RMDN3	0.143643
CD86	0.143613
STAP2	0.143609
KLRC2	0.143588
KMO	0.143549
ptger3	0.14349
SHC1	0.143422
ARRB1	0.14342
TC2N	0.143411
LIMS3	0.143339
B3GNT3	0.143175
MYO1F	0.143122
PRRX1	0.143121
VNN2	0.143091
AKTIP	0.142988
MAPK9	0.142872
EDIL3	0.142852
AFAP1	0.142842
PLK2	0.142835
LPCAT2	0.142832
CYTH2	0.142802
CDK9	0.142768
NPTN	0.142739
ITGAX	0.142712
LXN	0.142669
S100A8	0.14259
LRRCC1	0.142492
SMIM15	0.142447
DUSP1	0.142357
GGT5	0.142239
GALNT4	0.142215
C2CD2L	0.142205
hla-a	0.142177
PSAP	0.142125
NANS	0.142123
C6	0.142084
TMED7	0.141998
ITGA4	0.141989
CDC27	0.141913
SOCS6	0.14189
ISOC1	0.141809
FAM65B	0.141653
ERG	0.141606
IFI35	0.141595
TBX3	0.141528
P4HA2	0.141512
SYBU	0.141501
SLC2A6	0.14146
LILRB3	0.141388
VMO1	0.141374
RAP1A	0.141298
TMF1	0.14119
PUS10	0.141152
CDR2L	0.141142
CHST6	0.141139
HOPX	0.141109
ACTR2	0.141015
TM2D2	0.141013
JUNB	0.140884
DOCK2	0.140813
GALNT2	0.140765
TSTD2	0.140646
CHRNA1	0.140618
ATP6V1G1	0.140507
IPCEF1	0.14049
SERPINF1	0.140477
PPIB	0.140394
ZC3H3	0.140387
PLCL2	0.140312
NCKAP1	0.140295
APOBEC3G	0.140291
fam83h	0.140278
GRIA2	0.140245
BLZF1	0.140205
GIMAP8	0.140161
COL16A1	0.140156
PLS1	0.14015
TAOK3	0.14006
LAIR2	0.140013
LOXL2	0.139912
PRCP	0.139807
2019-09-07	0.139766
USP40	0.139758
NPC2	0.139655
YIPF4	0.13965
G0S2	0.139644
NFKBIE	0.139627
THSD7B	0.13962
CD209	0.139537
FBXO3	0.139535
PELO	0.139529
POC1B	0.139519
ADAM23	0.139468
MKNK1	0.139463
CXCL9	0.139336
VCAN	0.139302
FAM3D	0.139246
PACSIN2	0.139236
ALOX5	0.139093
KRT14	0.139064
TGM2	0.139046
SELPLG	0.139012
TALDO1	0.138989
c5ar1	0.138903
IFNGR1	0.138892
MYL12A	0.13887
MYOF	0.138764
NSMAF	0.13874
MAN1B1	0.1387
TXNDC9	0.1387
SLC35F2	0.138682
RASGEF1B	0.138645
zfyve21	0.138638
ELMOD2	0.138637
KCTD12	0.138628
UCP2	0.138607
NCKAP1L	0.138595
TICAM1	0.138535
NEDD4	0.138531
SLC40A1	0.138469
nat1	0.138385
mgarp	0.138364
SLC1A3	0.138347
CD68	0.138258
RAB1A	0.138105
SEC11C	0.138096
HIST1H1C	0.138091
STEAP1	0.138067
rhov	0.138005
CARD9	0.137992
SMPDL3A	0.137989
TSC22D1	0.137968
CDC42SE2	0.137947
CYB561A3	0.137941
S100A1	0.137926
ENPP2	0.137846
C11orf54	0.137829
BAG3	0.137713
UGT2B7	0.137681
TFIP11	0.137656
VPS37C	0.137573
TNFRSF10D	0.137551
PHF2	0.137285
SYT7	0.137273
PRKAR1A	0.137224
SAMD9L	0.137174
UBD	0.137159
CD109	0.136984
PTHLH	0.136931
ERAP1	0.136865
KLF2	0.136856
SELENOF	0.136847
adck5	0.136844
STRN	0.136647
SEC62	0.136571
ZNF250	0.136556
TYROBP	0.136555
MMP9	0.136443
DENND3	0.136435
SRD5A3	0.136426
OCIAD2	0.136407
ABCC3	0.136339
RGS3	0.136314
TSPO	0.136306
MERTK	0.136287
GNLY	0.136257
ZNF552	0.136234
CDNF	0.136197
SERINC5	0.136056
SNX9	0.136026
OCIAD1	0.136012
CGNL1	0.136003
SPATA9	0.136001
MAN1C1	0.135917
C1QTNF7	0.135896
C6orf1	0.135848
SYTL2	0.135828
PLEKHH2	0.135751
COL10A1	0.135625
ARHGEF10L	0.135461
PLEKHA6	0.135392
SIX4	0.13539
AFTPH	0.135384
SCRIB	0.135349
serhl	0.13531
RSPRY1	0.135306
LNPEP	0.135145
CD48	0.135076
ciita	0.134983
SMCO4	0.134977
ADGRF4	0.134906
PPP1R7	0.134903
TMX3	0.13489
MTMR12	0.134889
CTNNAL1	0.134889
NDUFA6	0.134855
TNFAIP8L2	0.134808
PKNOX2	0.134802
RUNX2	0.134739
GON7	0.134714
MYO6	0.134649
EDNRB	0.134604
PTGFRN	0.134579
ACSF2	0.134544
MCUB	0.134478
ADCY5	0.134412
EBF1	0.1344
RAB20	0.134319
CNDP1	0.134318
DSE	0.134279
DEFB4A	0.134254
DNAJB4	0.134123
PLAU	0.134055
CPM	0.133993
EIF4E	0.133937
DCSTAMP	0.133823
GALNT1	0.13381
VIT	0.133646
DOCK8	0.133625
HLA-DRB6	0.133622
NUDT3	0.13349
UCA1	0.133471
st6galnac2	0.133446
TBC1D2	0.133446
SLC4A7	0.1334
BIN2	0.133366
SFMBT2	0.133321
AFF1	0.133252
REXO2	0.133222
ISM1	0.133141
PRRC1	0.133049
NUB1	0.132998
AZI2	0.132978
slc2a5	0.132914
FOS	0.132882
Klrb1	0.132875
GSKIP	0.132852
LRP10	0.132815
FAM84B	0.132812
ITGA1	0.132808
hla-dqa1	0.132782
CYLD	0.132775
STIM2	0.132751
RALGPS2	0.132709
mia2	0.132699
CD300A	0.132653
RAB21	0.132585
Cxcr6	0.132546
XDH	0.132528
SLC37A2	0.13245
IGFBP4	0.132429
SIPA1	0.132397
LSP1	0.132394
MLC1	0.132376
2019-03-01	0.132344
ADGRL4	0.132322
ZNF683	0.13226
ITK	0.132214
SQSTM1	0.132154
FAM126B	0.132142
CYB5B	0.132077
CALCRL	0.132011
MFSD14B	0.131843
CD4	0.131807
MRPL33	0.131724
CHMP3	0.131662
JKAMP	0.131546
DCANP1	0.131525
IFIH1	0.131491
HGH1	0.131487
CBLC	0.131375
DNAJB6	0.13136
FOXL2	0.13131
MOB3B	0.131261
PER2	0.131253
arhgap15	0.131244
CD163L1	0.131154
MTMR10	0.131108
ADAP2	0.13108
SGCB	0.131031
CD38	0.131014
LIF	0.131007
REEP6	0.131004
SPTY2D1	0.130968
CCDC190	0.130945
C2	0.13094
MFSD8	0.130938
SLC50A1	0.1309
PLCG2	0.130891
ARRDC1	0.130717
LAMA2	0.130548
FCER1A	0.130541
FAM174A	0.130523
MR1	0.130433
MAN1A1	0.130405
MOB3C	0.130376
ARNTL	0.130309
SDHD	0.130302
GMFG	0.130262
ZFAT	0.130121
SPECC1	0.130093
SBNO2	0.13005
CCDC47	0.13001
CCDC96	0.129929
MORC3	0.129893
EHD1	0.12989
MTRR	0.129881
dok2	0.12983
PDE7B	0.129803
RASSF5	0.12976
OGN	0.129752
VANGL1	0.129675
unc93b1	0.129674
GAPT	0.129653
CYTH4	0.129622
ICK	0.129564
PLXNC1	0.129525
IGIP	0.12946
APOD	0.129417
UGCG	0.129368
SUCNR1	0.129304
C8orf59	0.129231
KIAA0930	0.129221
UBR1	0.129211
DECR1	0.12919
GLYATL2	0.12916
WBP2	0.129082
WNT5A	0.129032
SLAMF7	0.128962
PTP4A3	0.128959
TOM1	0.128947
CWH43	0.128905
ERGIC1	0.128899
FKBP14	0.128843
CD96	0.128832
ATRNL1	0.128826
PPM1A	0.128808
GRB2	0.128785
SELL	0.128785
CD300C	0.128726
NMNAT1	0.128698
KCTD9	0.128665
SLAMF6	0.128617
XAF1	0.128598
RASGRP3	0.128595
ATP6V1H	0.128587
CADPS2	0.128566
C4BPA	0.128524
EMC3	0.128377
CD63	0.128349
ATP6V0E1	0.128345
EEF1D	0.128336
IL15RA	0.128317
TMSB4XP8	0.128314
TMED9	0.128296
ALG5	0.12824
PPP1R16A	0.12822
GUCY1B3	0.128218
SLC39A1	0.128202
TNFRSF10C	0.12818
CHMP4A	0.128153
lmtk3	0.128102
EMC7	0.128082
calhm3	0.128048
AKAP13	0.128026
UNC5C	0.127996
GPR171	0.127798
NAPRT	0.12773
CDCP1	0.127702
ADAM19	0.127698
PCDHGC3	0.127652
EEF2KMT	0.127623
OGFRL1	0.127618
KRT6B	0.127611
ZNF25	0.127555
CDKN1A	0.127536
CFAP206	0.127514
PACS1	0.127482
UBAC1	0.127469
LOX	0.127447
CDC20B	0.127445
UBE2K	0.127423
SERTAD4	0.1274
COL1A1	0.127356
FDPS	0.127355
ZNF280D	0.127208
AMPD3	0.127172
PLK4	0.12716
METTL14	0.127075
GM2A	0.127033
gbp7	0.127006
GUCY1A3	0.12699
Tpsab1	0.126961
CXCL8	0.126959
nbl1	0.126906
lcmt2	0.126849
RBBP8NL	0.126841
NMD3	0.1268
SPAG11B	0.126741
LY86	0.126718
NBEAL1	0.126712
RETSAT	0.126692
LYVE1	0.126626
WIPF1	0.126569
ASPH	0.126566
PGM2	0.126477
WAC	0.126474
CALCOCO2	0.126403
TRIM32	0.12638
HGSNAT	0.126373
HLA-G	0.12637
PARVA	0.126364
NSUN2	0.126318
ALG1	0.126318
JAG1	0.126317
UBASH3B	0.1261
LRRN2	0.126079
SLC30A7	0.126029
RGS1	0.125986
PLA2R1	0.125963
SASH1	0.125774
SLC5A8	0.125758
TMED3	0.125711
PON2	0.125706
ALDH1A3	0.125667
NXNL2	0.125606
RIMBP2	0.12553
ANXA5	0.125519
USO1	0.125513
CAPN2	0.125459
PTPRB	0.125436
PRF1	0.125319
FAP	0.125236
PPP1R13L	0.125065
DYRK3	0.125064
MFSD7	0.125015
CAST	0.124972
MRPS18A	0.124971
ADCY9	0.124946
MRAS	0.124888
KLK8	0.12485
LPAR1	0.124834
SLC39A9	0.124801
ARPC4	0.12478
RASL11A	0.12477
TBL1XR1	0.124749
HK3	0.124724
KCNE3	0.124651
ATL3	0.124624
RNF183	0.124588
MYO10	0.124484
DDX60L	0.12444
IBTK	0.124423
GNB4	0.124385
CLSTN1	0.124295
SIL1	0.124225
FN1	0.124215
RAC2	0.124184
PLN	0.124167
SCAMP2	0.124131
NAAA	0.124089
ARPC5L	0.124086
CARNMT1	0.124068
ABHD3	0.124061
SPON2	0.123972
DBI	0.123943
TNFAIP6	0.123912
ACTN1	0.123883
LACTB2	0.123865
KLK10	0.123833
HACD4	0.123751
IDH2	0.123713
pcsk7	0.123712
ELF1	0.123703
TMEM165	0.123688
PTGDR	0.123687
MRFAP1	0.123661
BSCL2	0.123649
TRIM21	0.123607
KCNS3	0.123554
LRRC4	0.12354
DOCK5	0.123539
OSBPL10	0.123533
ARHGAP1	0.123471
RNF111	0.123441
TMEM156	0.123415
PEX2	0.123401
PML	0.123329
NRCAM	0.123315
SLC30A6	0.123281
CLGN	0.123218
KLRC1	0.123173
ABHD17C	0.123059
CYTOR	0.123049
FAM98A	0.122999
LCP1	0.122992
NAGK	0.122986
REL	0.122922
WDR1	0.122886
KRT16	0.122886
BTLA	0.122852
TEX2	0.122849
RSAD2	0.122843
DEFB103B	0.122822
UBB	0.122682
PDIA3	0.12264
TNFSF12	0.122599
UNC5B	0.122542
C19orf18	0.122422
NAB1	0.122375
VCL	0.12232
DDRGK1	0.122304
TFEC	0.122187
GPR183	0.122176
UGT2B17	0.122143
CLN5	0.122128
SERINC3	0.12211
KLHL5	0.122073
COG7	0.122042
KRT6C	0.121964
THBD	0.121936
PFKFB3	0.12192
CLEC14A	0.12191
TMEM26	0.121858
MALL	0.121815
ST3GAL6	0.121775
DOK7	0.121641
SECTM1	0.121632
IRAK3	0.121594
GNA15	0.121497
NPL	0.121421
SC5D	0.121396
WARS	0.121377
C1GALT1	0.121373
HMGCR	0.121351
ABI3	0.121279
RSU1	0.12124
BIRC2	0.121222
GLIPR2	0.121199
FAM63B	0.121183
MMP19	0.121139
FAIM2	0.121099
APOL4	0.121057
TENM4	0.121012
TRPM4	0.120932
PTPRG	0.120902
COL5A1	0.120897
CUTC	0.120855
LUM	0.120839
BCAR3	0.120828
angptl2	0.120825
BTN3A3	0.120814
NUDT22	0.120645
CBLN4	0.120627
SYNJ2	0.120601
SLU7	0.120545
SETD7	0.120544
S100A5	0.120489
FAM188B	0.120486
EPHB3	0.120483
cbr3	0.120469
CMYA5	0.120429
APLP2	0.120404
CXCL5	0.120395
NOD1	0.120259
EXOC6	0.120231
EGFR	0.120229
LRPAP1	0.120197
LRIF1	0.120112
SELENOS	0.120008
ZNF622	0.120002
EEA1	0.119992
MXRA8	0.119973
DDIT4L	0.119973
MACF1	0.119972
STXBP6	0.119927
IFI30	0.119922
BIRC3	0.119907
DNAJC17	0.119877
CTTN	0.119805
COL5A2	0.119802
STARD3NL	0.119791
CCDC126	0.119776
LRRC14	0.119775
CDC42BPA	0.119753
TBC1D9	0.119749
TMEM127	0.119669
LOXL4	0.119586
MFAP3L	0.119571
DNAJC21	0.119447
YPEL5	0.119445
PPP1CA	0.119274
UBR3	0.119272
C10orf128	0.119272
UBA3	0.119265
SP100	0.119197
FRMD8	0.119137
ADRA1B	0.119129
KLHDC8A	0.119099
BNIP2	0.119067
SNRK	0.119061
ICOS	0.119016
ARID5B	0.118973
EPDR1	0.118903
CILP	0.11885
ATP10D	0.118807
R3HDM4	0.118806
RNF141	0.118777
RNF213	0.118774
CD34	0.11875
DHRS9	0.11873
RASAL3	0.1187
RUNX1T1	0.118669
TMEM63A	0.118592
HHEX	0.118565
DIO2	0.118552
BMPR2	0.118535
SCP2	0.118463
ZMAT2	0.118455
F2R	0.118439
TMX4	0.118343
MCEE	0.118291
SNAP23	0.118278
CD37	0.118243
MYO5A	0.118162
BDKRB2	0.118149
SLC10A7	0.118032
TBC1D12	0.117992
MUC5B	0.117966
ODF2L	0.117942
PHF11	0.11789
FBXO6	0.117821
SDAD1	0.117798
NCF4	0.117775
CYR61	0.117723
LILRB1	0.117703
PRSS22	0.117674
HCAR2	0.117642
MUC1	0.117606
SPINT1	0.117505
LRRC32	0.117485
RNF103	0.117466
TNFRSF12A	0.117457
TDO2	0.117457
EPB41L2	0.117452
LRRC8E	0.117419
LGALS14	0.117392
ELOVL5	0.117383
KCNMB1	0.117339
PIK3CG	0.117338
LIN7C	0.117335
PTGES	0.117275
CREB3	0.117209
ETFB	0.117208
CPSF2	0.11718
CHP1	0.117159
LRRFIP2	0.117131
MFSD3	0.117119
ACTR3C	0.117079
FAM196A	0.117035
TRIB1	0.116895
CD80	0.116894
GPX1	0.116881
UTP3	0.116845
SWAP70	0.116815
RAMP1	0.116814
BMP2K	0.116802
DENND1B	0.116774
SAA1	0.116726
CLUAP1	0.116723
EREG	0.116689
SMARCD3	0.116677
chpf2	0.116562
USP38	0.116562
FBXO9	0.116549
VAMP8	0.116516
CDC42EP4	0.116515
KIAA0368	0.116487
PTBP3	0.116445
SLAIN1	0.116401
INHBA	0.116338
COL8A1	0.116278
BATF2	0.116203
KLF4	0.116191
LGALS17A	0.115994
COL14A1	0.115948
CLU	0.115926
MCL1	0.115915
LRRTM3	0.115911
GOLM1	0.115873
RECK	0.115864
PARP8	0.115835
SCFD2	0.115817
C2orf88	0.115816
c6orf62	0.115791
GDPD3	0.115755
RAD23B	0.115742
HSPH1	0.115734
UBE2D1	0.115695
HSD3B7	0.11566
ZFP36	0.115647
TLE4	0.115615
ANKRD29	0.115592
DNAJB5	0.115522
ZBTB41	0.115482
TYMP	0.115467
SLC30A5	0.115428
CHODL	0.115413
EFHD1	0.115398
OAT	0.115381
ACKR4	0.115344
NAMPT	0.115334
RAB23	0.115259
GAPVD1	0.115169
IRF2	0.115151
B3GALNT1	0.115147
BIRC6	0.115144
SESTD1	0.11513
FZD4	0.115086
HERC4	0.115071
TNFRSF9	0.115029
SERTAD1	0.114858
TGOLN2	0.114845
SGPP2	0.11481
UBLCP1	0.114803
KIF2A	0.1148
VAV1	0.114774
AK1	0.114739
DNAJC25	0.114672
MLKL	0.114664
RAP1GAP	0.114659
ANGPT1	0.114653
NTMT1	0.114604
[truncated: 15,520 more rows]

## Sheet: Supplementary document 2
Supplementary document 2.The complete list of differential gene set
GeneSet	Normalized Enrichment Score (NES)	p-value	FDR q-value	Upregulated in class
GO_ENTRY_INTO_OTHER_ORGANISM_INVOLVED_IN_SYMBIOTIC_INTERACTION	2.13	0	0.175	HIGH
GO_GOLGI_ASSOCIATED_VESICLE	2.11	0	0.135	HIGH
GO_CYTOKINE_PRODUCTION_INVOLVED_IN_IMMUNE_RESPONSE	2.09	0.0016	0.121	HIGH
GO_NEGATIVE_REGULATION_OF_ERK1_AND_ERK2_CASCADE	2.09	0	0.098	HIGH
GO_EXOGENOUS_PROTEIN_BINDING	2.05	0	0.14	HIGH
GO_REGULATION_OF_NIK_NF_KAPPAB_SIGNALING	2.04	0	0.136	HIGH
GO_POSITIVE_REGULATION_OF_I_KAPPAB_KINASE_NF_KAPPAB_SIGNALING	2.04	0.0008	0.132	HIGH
GO_NEGATIVE_REGULATION_OF_ESTABLISHMENT_OF_PROTEIN_LOCALIZATION	2.03	0	0.129	HIGH
GO_GOLGI_ASSOCIATED_VESICLE_MEMBRANE	2.03	0	0.117	HIGH
GO_REGULATION_OF_TISSUE_REMODELING	2.01	0	0.126	HIGH
GO_I_KAPPAB_KINASE_NF_KAPPAB_SIGNALING	2.01	0.0008	0.118	HIGH
GO_TOLL_LIKE_RECEPTOR_4_SIGNALING_PATHWAY	2	0.0008	0.121	HIGH
GO_TRANSFORMING_GROWTH_FACTOR_BETA_PRODUCTION	2	0	0.122	HIGH
GO_T_CELL_CYTOKINE_PRODUCTION	2	0.0008	0.121	HIGH
GO_NEGATIVE_REGULATION_OF_INTERLEUKIN_2_PRODUCTION	2	0	0.118	HIGH
GO_REGULATION_OF_CYTOKINE_PRODUCTION_INVOLVED_IN_IMMUNE_RESPONSE	1.99	0.0024	0.116	HIGH
GO_RESPONSE_TO_MOLECULE_OF_BACTERIAL_ORIGIN	1.99	0.0023	0.11	HIGH
GO_POSITIVE_REGULATION_OF_TOLL_LIKE_RECEPTOR_SIGNALING_PATHWAY	1.99	0.0008	0.106	HIGH
GO_LIPOPOLYSACCHARIDE_MEDIATED_SIGNALING_PATHWAY	1.98	0.0031	0.103	HIGH
GO_INTERLEUKIN_1_PRODUCTION	1.98	0	0.099	HIGH
Note: HIGH is a transcriptome of ovarian cancer with HIGH expression of NCALD.

## Sheet: Supplementary document 3
Supplementary document 3.Stratified analysis.
Clinical characteristics	NCALD expression（TCGA）					NCALD expression（IHC）
	chemoresistant		chemosensitive		P	chemoresistant		chemosensitive		P
	low	high	low	high		low	high	low	high
FIGO stage
I-II	1	0	6	7	1	5	3	13	17	0.571
over-expression rate	0		0.5385			0.375		0.5667
III-IV	36	53	95	89	0.083	42	18	34	40	0.005*
over-expression rate	0.5955		0.4831			0.3		0.5405
Grade
3	33	48	84	78	0.102	38	19	34	50	0.002*
over-expression rate	0.5926		0.4815			0.3333		0.59
2	4	4	15	15	1	5	2	0.52	3	1
over-expression rate	0.5		0.5			0.2857		0.3333
1	0	0	0	0	-	2	0	4	0	-
over-expression rate	-		-			0		0
Histology types
Serous	37	53	102	95	0.093	25	21	32	51	0.084
over-expression rate	0.5889		0.4822			0.4565		0.6145
Mucinous	0	0	0	0	-	6	0	3	1	0.4
over-expression rate	-		-			0		0.25
Others	0	0	0	0	-	19	0	13	7	0.015*
over-expression rate	-		-			0		0.35
surgical debulking
Optimal	3	6	22	25	0.705	21	7	27	16	0.283
over-expression rate	0.6667		0.5319			0.25		0.3721
Suboptimal	31	45	68	60	0.088	18	6	7	8	0.073
over-expression rate	0.5921		0.4688			0.25		0.5333
